## Optimal growth of microbes on mixed carbon sources

Xin Wang <sup>a,1</sup> and Chao Tang <sup>a,2</sup>

<sup>a</sup>Center for Quantitative Biology, School of Physics and Peking-Tsinghua Center for Life Sciences, Peking University, Beijing 100871, China

<sup>1</sup>Present address: Rudolf Peierls Centre for Theoretical Physics, University of Oxford, Oxford OX1 3NP, UK.

<sup>2</sup>To whom correspondence should be addressed. Email: [tangc@pku.edu.cn](mailto:tangc@pku.edu.cn).

**Corresponding Author:** Chao Tang, Center for Quantitative Biology, Peking University, 5 Yiheyuan Road, Beijing 100871, China. Tel: +86-10-62752003. E-mail: [tangc@pku.edu.cn](mailto:tangc@pku.edu.cn).

**Keywords:** Cell growth, diauxie, co-utilization, optimality, metabolic network, catabolite repression, cell decision-making

## Abstract

A classic problem in microbiology is that bacteria display two types of growth behavior when cultured on a mixture of two carbon sources: in certain mixtures the bacteria consume the two carbon sources sequentially (diauxie) and in other mixtures the bacteria consume both sources simultaneously (co-utilization). The search for the molecular mechanism of diauxie led to the discovery of the lac operon and gene regulation in general. However, why microbes would bother to have different strategies of taking up nutrients remained a mystery. Here we show that diauxie versus co-utilization can be understood from the topological features of the metabolic network. A model of optimal allocation of protein resources to achieve maximum growth quantitatively explains why and how the cell makes the choice when facing multiple carbon sources. Our work solves a long-standing puzzle and sheds light on microbes' optimal growth in different nutrient conditions.

During the course of evolution, biological systems have acquired a myriad of strategies to adapt to their environments. A great challenge is to understand the rationale of these strategies on quantitative bases. It has long been discovered that the production of digestive enzymes in a microorganism depends on (adapts to) the composition of the medium (1). More precisely, in the 1940s Jacques Monod observed two distinct strategies in bacteria (*E. coli* and *B. subtilis*) to take up nutrients. He cultured these bacteria on a mixture of two carbon sources, and found that for certain mixtures the bacteria consume both nutrients simultaneously while for other mixtures they consume the two nutrients one after another (2, 3). The latter case resulted a growth curve consisted of two consecutive exponentials, for which he termed this phenomenon “diauxie”. Subsequent studies revealed that the two types of growth behavior, diauxic- and co-utilization of carbon sources are common in microorganisms (4-8). The regulatory mechanism responsible for diauxie, that is the molecular mechanism for the microbes to express only the enzymes for the preferred carbon source even when multiple sources are present, is commonly ascribed to catabolite repression (5, 9-13). In bacteria it is exemplified by the *lac* operon and the cAMP-Crp system (14-17). In yeast, the molecular implementation of catabolite repression differs, but the logic and the outcome are similar (5).

Why have microbes evolved to possess the two strategies and what are the determining factors for them to choose one versus the other? For unicellular organisms, long term survival and growth at the population level are paramount. In the exponential growth phase,

cell optimizes growth by optimally allocating its resources (18-24). In particular, Hwa and colleagues developed a model of optimal growth with constraints on protein resource (20, 21). In this paper, we extend this approach to address the question of multiple carbon sources and show that the two growth strategies can be understood from optimal growth further constrained by the topological features of the metabolic network.

### **Categorization of Carbon Sources**

Carbon sources taken by the cell serve as substrates of the metabolic network, in which they are broken down to supply pools of amino acids and other components that make up a cell. Note that amino acids take up a majority of carbon supply (about 55%) (25-27). As shown in Fig. 1, different carbon sources enter the metabolic network at different points (27). Denote those sources entering the upper part of the glycolysis Group A and those joining at other points of the metabolic network Group B (Fig. 1). Studies have shown that when mixing a carbon source of Group A with that of Group B, the bacteria tend to co-utilize both sources and the growth rate is higher than that with each individual source (6, 7, 28). When mixing two sources both from Group A, the bacteria usually utilize a preferred source (of higher growth rate) first (4, 6, 11, 13, 29, 30).

### **Origin of Diauxie for Carbon Sources in Group A**

Let us first consider the case in which both carbon sources are from Group A. In this case, if we group the precursors of biomass components (amino acids and others) into various pools, then all these pools lie downstream of the carbon sources (Fig. 1). The topology of

the metabolic network is then equivalent to Fig. 2A (see Methods), where  $A1$  and  $A2$  can be any two carbon sources from Group A. We proceed to solve this simple model using an optimization principle (20, 21) (see Methods).

In Fig. 2A, enzymes carrying and digesting nutrient  $Ai$  ( $i=1, 2$ ) into the precursor pools are simplified to a single enzyme  $E_{Ai}$  with protein mass fraction  $\phi_{Ai} = \frac{M_{E_{Ai}}}{M_{cell}^{protein}}$ , where  $M_{E_{Ai}}$  is the total mass of the enzyme  $E_{Ai}$  and  $M_{cell}^{protein}$  the total protein mass in the cell. The carbon flux to the precursor pools from source  $Ai$  is proportional to  $\phi_{Ai}$  and takes the Michaelis-Menten form (see Supporting Information for details):

$$J_{Ai} = \phi_{Ai} \cdot \kappa_{Ai}, \text{ where } \kappa_{Ai} = k_{Ai} \cdot \frac{[Ai]}{[Ai] + K_{Ai}} \text{ (which we denote as the nutrient quality)}$$

with  $[Ai]$  being the concentration of  $Ai$ . We define nutrient efficiency of a carbon source as the carbon flux delivered divided by the protein mass fraction dedicated to the delivery.

In this model, it is simply  $J_{Ai} / \phi_{Ai} = \kappa_{Ai}$ . Pools of precursors are utilized to manufacture biomass with a flux rate proportional to the growth rate of the cell:  $\lambda = \phi_S \cdot \kappa_S$ , where  $\phi_S$  represents the protein mass fraction of the enzymes dedicated in synthesizing biomass from the precursor pools, and  $\kappa_S$  a kinetic constant (see Supporting Information for details). Since the ribosomes by far constitute the majority of the enzymes for biomass synthesis,  $\phi_S$  is dominated by  $\phi_R$ , the mass fraction of the ribosomes and  $\kappa_S \approx \kappa_t$ , where  $\kappa_t$  is a parameter determined by protein translation rate (20, 21). The protein mass and carbon flux constraints give (see Supporting Information for details)

$$\phi_S + \phi_{A1} + \phi_{A2} \leq \phi_{\max} \quad (1)$$

$$\phi_{A1} \cdot \kappa_{A1} + \phi_{A2} \cdot \kappa_{A2} \geq \phi_S \cdot \kappa_S = \lambda \quad (2)$$

Where  $\phi_{\max}$  is a positive constant less than 1, representing the largest proportion of protein mass that can be allocated to  $\phi_S$ ,  $\phi_{A1}$  and  $\phi_{A2}$ . These relations are depicted in a 3-dimensional graph (Fig. 2B), with  $\phi_{A1}$  the x-axis,  $\phi_{A2}$  the y-axis and  $\lambda$  ( $=\phi_S \cdot \kappa_S$ ) the z-axis. The yellow plane corresponds to the upper bound of Eq. 1, while the light red plane the upper bound of Eq. 2.  $\phi_{A1}$ ,  $\phi_{A2}$  and  $\lambda$  should all be non-negative. Under these conditions, the optimal solution (solution with maximal  $\lambda$ ) should be at either  $X_{A1}$  or  $X_{A2}$  (Fig. 2B). If  $\kappa_{A1} > \kappa_{A2}$ , then  $X_{A1}$  is the optimal point with  $\phi_{A1} = \frac{\phi_{\max}}{\kappa_{A1}/\kappa_S + 1}$  and  $\phi_{A2} = 0$  (see Supporting Information for details), which means that the cell expresses only the enzyme for A1 and thus utilizes only A1. Conversely, if  $\kappa_{A1} < \kappa_{A2}$ , the optimal solution is  $X_{A2}$  and the cell utilizes only A2. In either case, cells only consume the preferable carbon source, which corresponds to the case of diauxie (2, 3, 6, 9, 11).

In the above coarse-grained model, the nutrient efficiency of the carbon source  $Ai$  is lump summed in a single effective parameter  $\kappa_{Ai}$ . In practice, there are intermediate nodes and enzymes along the pathway as depicted in Fig. 2C. So in order to make comparison between the actual carbon sources, one should take into account the cost of enzymes for the intermediates. Denote  $\phi_{Ai}^j$  the enzymes catalyzing the intermediate nodes  $m_{Ai}^j$  ( $i=1, 2; j=1, 2, \dots, N_{Ai}$ ), and define  $\phi'_{Ai} = \phi_{Ai} + \sum_{j=1}^{N_{Ai}} \phi_{Ai}^j$ , which is the total fractional

protein mass for enzymes dedicated to the branch  $Ai \rightarrow M$ . The nutrient efficiency for the

branch is then  $\varepsilon_{Ai} = J_{Ai \rightarrow M} / \phi'_{Ai}$ , where  $J_{Ai \rightarrow M}$  is the carbon flux from  $Ai$  to  $M$  ( $i=1,2$ ).

Assuming that the flux is conserved along the branch so that  $J_{Ai \rightarrow M} = \phi_{Ai} \cdot \kappa_{Ai} = \phi_{Ai}^j \cdot \kappa_{Ai}^j$ ,

( $j=1, 2, \dots, N_{Ai}$ ), where  $\kappa_{Ai}^j = k_{Ai}^j \cdot \frac{[m_{Ai}^j]}{[m_{Ai}^j] + K_{Ai}^j} \approx k_{Ai}^j$  is the substrate quality of  $m_{Ai}^j$ , we

have (see Supporting Information for details)

$$\varepsilon_{Ai} = \frac{1}{1/\kappa_{Ai} + \sum_j \frac{1}{\kappa_{Ai}^j}} \approx \frac{1}{1/\kappa_{Ai} + \sum_j \frac{1}{k_{Ai}^j}}. \quad (3)$$

The equivalent of Eqs. 1 and 2 is

$$\begin{aligned} \phi_S + \phi_M + \phi'_{A1} + \phi'_{A2} &\leq \phi_{\max} \\ \phi'_{A1} \cdot \varepsilon_{A1} + \phi'_{A2} \cdot \varepsilon_{A2} &\geq \phi_M \cdot \kappa_M \geq \phi_S \cdot \kappa_S = \lambda \end{aligned} \quad (4)$$

For  $\varepsilon_{A1} > \varepsilon_{A2}$ , the optimal solution is  $\phi_{A1} = \lambda / \kappa_{A1}$ ,  $\phi_{A1}^j = \lambda / \kappa_{Ai}^j$ ,  $\phi_{A2} = \phi_{A2}^j = 0$ ,

$\phi_M = \lambda / \kappa_M$ , and

$$\lambda = \frac{\phi_{\max}}{(1/\kappa_S + 1/\varepsilon_{A1} + 1/\kappa_M)}. \quad (5)$$

Only the nutrient ( $A1$ ) with higher efficiency ( $\varepsilon_{A1}$ ) is utilized. Note that the growth rate is the same as when cultured with  $A1$  alone.

## Ratio Sensing

We have shown that when there are two Group A sources  $A1$  and  $A2$  available, the cell will only utilize the one with higher efficiency. However, note that the nutrient efficiency  $\varepsilon_{Ai}$  (Eq. 3) depends on the concentration of the nutrient  $[Ai]$  through the nutrient quality

$\kappa_{Ai} = k_{Ai} \cdot \frac{[Ai]}{[Ai] + K_{Ai}}$ .  $\varepsilon_{Ai}([Ai])$  decreases with  $[Ai]$ . Thus an initially preferred carbon

source can become less preferable when its concentration becomes too low. This is

because for lower nutrient concentration more enzymes have to be used to deliver the

same carbon flux. Suppose that  $A1$  is a preferred carbon source than  $A2$  when both are

abundant ( $\varepsilon_{A1} > \varepsilon_{A2}$ , for  $[Ai] > K_{Ai}$  ( $i = 1, 2$ )). For a fixed  $[A2]$ , when the concentration

of  $A1$  drops below a value  $[A1]_T$  such that  $\varepsilon_{A1}([A1]_T) = \varepsilon_{A2}([A2])$ ,  $A2$  becomes more

efficient and should be utilized instead of  $A1$ . From Eq. 3, the turning point is given by

(see Supporting Information for details)

$$[A1]_T = \frac{k_{A1}^{A2} \cdot [A2]}{K_{A1}^{A2} + [A2]} \quad (6)$$

where  $k_{A1}^{A2} = \frac{K_{A1}}{c_{A1}^{A2} \cdot k_{A1}}$  and  $K_{A1}^{A2} = \frac{K_{A2}}{c_{A1}^{A2} \cdot k_{A2}}$ , in which the parameter  $c_{A1}^{A2}$  is defined as

$$c_{A1}^{A2} \equiv \frac{1}{\varepsilon_{A2}^{\max}} - \frac{1}{\varepsilon_{A1}^{\max}}, \text{ with } \varepsilon_{Ai}^{\max} \text{ the maximum branch efficiency of the nutrient } Ai \text{ (at}$$

saturating nutrient concentration). For  $[A2] \gg K_{A1}^{A2}$ , the turning point  $[A1]_T = k_{A1}^{A2}$  does

not depend on  $[A2]$ . For  $[A2] \ll K_{A1}^{A2}$ , the turning point is reduced to  $[A1]_T = \frac{k_{A1}^{A2}}{K_{A1}^{A2}} \cdot [A2]$ ,

a form of ratio sensing. That is, the cell will sense not the absolute concentration of  $[A1]$

and  $[A2]$ , but their ratio, to make the decision. Ratio sensing was recently observed in the

budding yeast *Saccharomyces cerevisiae* cultured in glucose-galactose mixed medium

(29). The measured turning point is in quantitative agreement with Eq. 6 (Fig. 3).

## Co-Utilization of Carbon Sources



The diauxic growth is due to the topology of the metabolic network, in which Group A sources enter the network in the upper part of the glycolysis and converge to a common node (G6P/F6P) before diverting to various precursor pools (Figs. 1 and 2C). The situation is different if the two mixed carbon sources are from Groups A and B, respectively (denoted as “A+B”). (Some combinations of two Group B sources also fall into this category and can be analyzed similarly; see Fig. S2C.) Group B sources can directly supply some precursor pools without going through the common node (G6P/F6P) (Fig. 1). As an example, the topology of the metabolic network in the presence of one Group A source in combination with the Group B source succinate is shown in Fig. 4A. More examples of “A+B” are shown in Fig. S2. All “A+B” cases can be mapped to a common coarse-grained model depicted in Fig. 4B, although the actual position of nodes  $M$  and  $N$  in the metabolic network, and the contents of Pools 1 and 2 may depend on each specific case. As obvious from Fig. 4B, source  $A$  or  $B$  alone could in principle supply all precursor pools. However, because of the location of the precursor pools relative to the sources, it may be more economical for one pool to draw carbon flux from one source and the other from the other source.

In the model, the two pools of precursors supply  $r_1$  and  $r_2$  carbon flux respectively to the synthesis of biomass. Two intermediate nodes  $M$  and  $N$  can interconvert to each other with the respective enzymes  $E'_M$  (of protein mass fraction  $\phi'_M$ ) and  $E'_N$  (of protein mass fraction  $\phi'_N$ ). To determine which of the two carbon sources

should supply which pool(s), we apply branch nutrient efficiency analysis. For Pool 1, we compare the efficiency of  $A$  and  $B$  in supplying flux to node  $M$ ; while for Pool 2 to node  $N$ . The results are

$$\text{Pool 1 is supplied by } \begin{cases} A, \text{ if } \varepsilon_{A \rightarrow M} > \varepsilon_{B \rightarrow M} \\ B, \text{ if } \varepsilon_{A \rightarrow M} < \varepsilon_{B \rightarrow M} \end{cases} \quad (7)$$

$$\text{Pool 2 is supplied by } \begin{cases} A, \text{ if } \varepsilon_{A \rightarrow N} > \varepsilon_{B \rightarrow N} \\ B, \text{ if } \varepsilon_{A \rightarrow N} < \varepsilon_{B \rightarrow N} \end{cases} \quad (8)$$

where  $\varepsilon_{A \rightarrow M} = \frac{1}{1/\kappa_A}$ ,  $\varepsilon_{B \rightarrow M} = \frac{1}{1/\kappa_B + 1/\kappa'_M}$ ,  $\varepsilon_{A \rightarrow N} = \frac{1}{1/\kappa_A + 1/\kappa'_N}$  and  $\varepsilon_{B \rightarrow N} = \frac{1}{1/\kappa_B}$ .

$$\kappa'_M \equiv J_{M \rightarrow N} / \phi'_M = k'_M \cdot \frac{[M]}{[M] + K'_M} \approx k'_M \quad \text{and} \quad \kappa'_N \equiv J_{N \rightarrow M} / \phi'_N = k'_N \cdot \frac{[N]}{[N] + K'_N} \approx k'_N \quad \text{are the}$$

substrate quality of  $M$  and  $N$  in reactions with enzyme  $E'_M$  and  $E'_N$ , respectively (see Supporting Information for details). It is easy to see from inequalities 7 and 8 that if the following condition is met

$$1/\kappa_B - 1/\kappa'_M < 1/\kappa_A < 1/\kappa_B + 1/\kappa'_N \quad (9)$$

then  $A$  supplies Pool 1 and  $B$  supplies Pool 2 -- the two carbon sources are simultaneously consumed. In reality, there are multiple intermediate nodes in between the  $M$ - $N$  interconversion (Figs. 1, 4A and S2). Similar to Eq. 3,  $1/\kappa'_M$  and  $1/\kappa'_N$  here actually represent summations of all intermediate terms between  $M$  and  $N$  in the metabolic network.

If  $A$  and  $B$  are co-utilized, the growth rate is (see Supporting Information for details)

$$\lambda_{A+B} = \phi_{\max} \cdot \left( \frac{r_1}{\kappa_A} + \frac{r_1}{\kappa_M} + \frac{r_2}{\kappa_B} + \frac{r_2}{\kappa_N} + \frac{1}{\kappa_S} \right)^{-1} \quad (10)$$

In comparison, with a single carbon source (*e.g.*  $A$ ), the growth rate is

$$\lambda_A = \phi_{\max} \cdot \left( \frac{r_1 + r_2}{\kappa_A} + \frac{r_1}{\kappa_M} + \frac{r_2}{\kappa'_M} + \frac{1}{\kappa_S} \right)^{-1}. \text{ As } 1/\kappa_A + 1/\kappa'_M > 1/\kappa_B \text{ (see Eq. 9, the}$$

condition for co-utilization),  $\lambda_{A+B} > \lambda_A$ .

## Carbon Source of Biomass components

In order to apply the above analysis to the real case, we collected the available data for metabolic enzymes from the literature (Table S1), and calculated the values of the branch nutrient efficiency from several carbon sources to the metabolites F6P, GA3P, 3PG, PEP, pyruvate or oxaloacetate, which correspond to the nodes  $M$  or  $N$  in the simplified network of Fig. 4B (see also Figs. 1, 4A and S2). The results are shown in Table S2. Applying the analysis of Eqs. 7 and 8 to the real network, one can identify the carbon source supplier of each amino acid pool and other precursors pools under optimal growth (Table S3).

## Discussion

The topology of the metabolic network can be simplified to coarse-grained models shown in Figs. 2A and 4B for the analyses of diauxie and co-utilization of carbon sources. The sources of Group A all go through a common intermediate node. Thus they compete for delivering carbon flux to the precursor pools. The more efficient one wins (22). It has been observed that there is a hierarchy among Group A sources ranked according to the growth

rate on single carbon source – when two or more sources are present the bacteria use the one that delivers the highest growth rate (6, 30). This is a natural consequence of our theory. As can be seen from Eq. 5, a higher growth rate implies a higher nutrient efficiency and thus a higher priority to be utilized. How this hierarchy is implemented molecularly is a very interesting question (13). Ratio sensing is another consequence of our theory. It remains to be seen experimentally whether it is widely implemented for all pairs of Group A nutrients and across microbes. It could well be that the microbe cares only about the most frequently encountered (or the most important) combinations of nutrients and would not invest resources to ratio sense the others.

When Group B source is present along with Group A source, it can take a shortcut to reach some of the precursor pools (Fig. 4) and can be more efficient to supply these pools. (Some combinations of two Group B sources may face the same situation and thus can be co-utilized.) An experimental test for our theory of co-utilization is to verify/falsify Table S3. There is no data yet in the literature to compare directly with Table S3. There are, however, experimental data on the relative fractions of fluxes the cells are drawing from the two carbon sources when cultured on sources A and B (6, 30). These quantities can be estimated with the knowledge of Table S3 and the composition of amino acids in a cell (27). The results are consistent with experimental data (Fig. 5). In a recent experiment with *Methylobacterium extorquens* AM1 (28), the carbon source of certain metabolites

were traced with isotope labeling in a co-utilization case. The outcome is consistent with our theory (see Supporting Information for details).

Cell growth is a fundamental issue in biology. The present work deals with relatively stable growth conditions and the simple exponential growth behavior. In this case, there is a body of experimental evidence for optimal growth (maximum growth rate) (18-24). In reality the environment the microbes face can be highly variable and uncertain. Their long-term “fitness” of the population may not simply be determined only by the growth rate of individual cells in the exponential phase, but a result of trade-offs that best adapt to the changing environment. Strategies such as bet hedging, memory of the past and anticipation of the future are found to exist in microorganisms (31-40). Furthermore, while the phenomena of diauxie versus co-utilization are widely spread in microbes, they are bound to be variations and exceptions. The nutrient uptake strategy or eating habit of a microbe is shaped by its environmental history. For example, certain microbes may have different hierarchies of preferable carbon sources (4). One challenge is to understand how cells and population behave in and evolve with the environment in a general and quantitative framework.

Another interesting point is cell-to-cell variability. What our theory gives is the average behavior. However, the behavior of individual cells can be variable. For example, in the ratio sensing experiment we discussed before (29), the turning point to switch on the galactose pathway is variable from cell to cell, and in each cell the switching is an

all-or-none transition (bistable with memory). The bistability and perhaps at least some of the variability in the switching point may well be the outcome of evolution to cope with environmental fluctuations and uncertainties. Interestingly, our prediction of the turning point agrees very well with the average behavior of the population (Fig. 3). A challenge in future research would be to quantitatively understand the variance.

## Methods

Coarse graining of the metabolic network is done in such a way as to preserve the network topology but grouping metabolites, enzymes and pathways into single representative nodes and corresponding effective enzymes. In particular, a linear pathway is lump summed into two nodes (start and end) connecting with a single effective enzyme.

The protein resource allocation model is based on the work of Hwa and colleagues (20, 21). For our purpose here, the proteins in a cell are partitioned into three classes: carbon catabolic enzymes (C), biomass synthesizing enzymes (S) and everything else (Q). The masses of the three classes add up to the total protein mass in a cell:

$$M_C + M_S + M_Q = M_{cell}^{protein}, \text{ or } \phi_C + \phi_S + \phi_Q = 1, \text{ where } \phi_u \equiv \frac{M_u}{M_{cell}^{protein}} \text{ (} u = C, S, Q \text{) is the}$$

protein mass fraction. Optimal growth is achieved by optimally distribute  $\phi_C$  and  $\phi_S$  under the constraint  $\phi_C + \phi_S = 1 - \phi_Q \leq \phi_{max}$ . With multiple carbon sources,  $\phi_C$  is broken

down to subgroups according to the sources and pathway topologies as shown in the main text.

## **Author Contributions**

X.W. and C.T. designed the study, developed the model, and wrote the paper. X.W. carried out the analysis.

## **Acknowledgements**

We are grateful to Yuan Yuan and Haoyuan Sun for their insights. We thank Xiaojing Yang, Shanshan Qin, Yimiao Qu and Chang Chang for helpful discussions. This work was supported by Chinese Ministry of Science and Technology (2015CB910300) and National Natural Science Foundation of China (91430217).

## References

1. Duclaux E (1899) *Traité de microbiologie* (Paris: Masson).
2. Monod J (1942) Recherches sur la croissance des cultures bactériennes. *Thesis, Hermann et Cie, Paris*.
3. Monod J (1947) The phenomenon of enzymatic adaptation and its bearings on problems of genetics and cellular differentiation. *Growth* 11:223-289.
4. Görke B & Stülke J (2008) Carbon catabolite repression in bacteria: many ways to make the most out of nutrients. *Nat Rev Microbiol* 6(8):613-624.
5. Gancedo JM (1998) Yeast carbon catabolite repression. *Microbiology and Molecular Biology Reviews* 62(2):334-361.
6. Hermesen R, Okano H, You C, Werner N, & Hwa T (2015) A growth-rate composition formula for the growth of E.coli on co-utilized carbon substrates. *Molecular systems biology* 11(4):801.
7. Kleijn RJ, *et al.* (2010) Metabolic fluxes during strong carbon catabolite repression by malate in *Bacillus subtilis*. *The Journal of biological chemistry* 285(3):1587-1596.
8. Narang A & Pilyugin SS (2007) Bacterial gene regulation in diauxic and non-diauxic growth. *Journal of theoretical biology* 244(2):326-348.
9. Magasanik B (1961) Catabolite Repression. *Cold Spring Harb Sym* 26:249-256.
10. Deutscher J, Francke C, & Postma PW (2006) How phosphotransferase system-related protein phosphorylation regulates carbohydrate metabolism in bacteria. *Microbiology and Molecular Biology Reviews* 70(4):939-1031.
11. Neidhardt FC & Magasanik B (1956) Inhibitory Effect of Glucose on Enzyme Formation. *Nature* 178(4537):801-802.
12. Deutscher J (2008) The mechanisms of carbon catabolite repression in bacteria. *Current opinion in microbiology* 11(2):87-93.



13. Aidelberg G, *et al.* (2014) Hierarchy of non-glucose sugars in *Escherichia coli*. *BMC Syst Biol* 8:133.
14. Kolb A, Busby S, Buc H, Garges S, & Adhya S (1993) Transcriptional regulation by cAMP and its receptor protein. *Annual review of biochemistry* 62:749-795.
15. Busby S & Ebright RH (1999) Transcription activation by catabolite activator protein (CAP). *Journal of molecular biology* 293(2):199-213.
16. Müller-Hill B (1996) *The lac operon* (New York:: Walter de Gruyter).
17. Jacob F & Monod J (1961) Genetic regulatory mechanisms in the synthesis of proteins. *Journal of molecular biology* 3(3):318-356.
18. You C, *et al.* (2013) Coordination of bacterial proteome with metabolism by cyclic AMP signalling. *Nature* 500(7462):301-306.
19. Scott M, Klumpp S, Mateescu EM, & Hwa T (2014) Emergence of robust growth laws from optimal regulation of ribosome synthesis. *Molecular systems biology* 10(8):747.
20. Scott M, Gunderson CW, Mateescu EM, Zhang Z, & Hwa T (2010) Interdependence of cell growth and gene expression: origins and consequences. *Science* 330(6007):1099-1102.
21. Hui S, *et al.* (2015) Quantitative proteomic analysis reveals a simple strategy of global resource allocation in bacteria. *Molecular systems biology* 11(1):784.
22. Thattai M & Shraiman BI (2003) Metabolic switching in the sugar phosphotransferase system of *Escherichia coli*. *Biophys J* 85(2):744-754.
23. Edwards JS, Ibarra RU, & Palsson BO (2001) In silico predictions of *Escherichia coli* metabolic capabilities are consistent with experimental data. *Nature biotechnology* 19(2):125-130.
24. Dekel E & Alon U (2005) Optimality and evolutionary tuning of the expression level of a protein. *Nature* 436(7050):588-592.
25. Neidhardt FC, Ingraham JL, & Schaechter M (1990) *Physiology of the bacterial*

- cell: a molecular approach* (Sinauer Sunderland).
26. Schönheit P, Buckel W, & Martin WF (2016) On the origin of heterotrophy. *Trends in microbiology* 24(1):12-25.
  27. Lehninger AL, Nelson DL, & Cox MM (2008) *Lehninger principles of biochemistry* (W.H. Freeman, New York) 5th Ed.
  28. Peyraud R, Kiefer P, Christen P, Portais J-C, & Vorholt JA (2012) Co-consumption of methanol and succinate by *Methylobacterium extorquens* AM1. *PLoS One* 7(11):e48271.
  29. Escalante-Chong R, *et al.* (2015) Galactose metabolic genes in yeast respond to a ratio of galactose and glucose. *Proceedings of the National Academy of Sciences of the United States of America* 112(5):1636-1641.
  30. Monod J (1949) The Growth of Bacterial Cultures. *Annu Rev Microbiol* 3:371-394.
  31. Kussell E & Leibler S (2005) Phenotypic diversity, population growth, and information in fluctuating environments. *Science* 309(5743):2075-2078.
  32. de Jong IG, Haccou P, & Kuipers OP (2011) Bet hedging or not? A guide to proper classification of microbial survival strategies. *BioEssays : news and reviews in molecular, cellular and developmental biology* 33(3):215-223.
  33. Lambert G & Kussell E (2014) Memory and fitness optimization of bacteria under fluctuating environments. *PLoS Genet* 10(9):e1004556.
  34. Mitchell A, *et al.* (2009) Adaptive prediction of environmental changes by microorganisms. *Nature* 460(7252):220-224.
  35. New AM, *et al.* (2014) Different levels of catabolite repression optimize growth in stable and variable environments. *Plos Biol* 12(1):e1001764.
  36. Siegal ML (2015) Shifting sugars and shifting paradigms. *Plos Biol* 13(2):e1002068.
  37. Venturelli OS, Zuleta I, Murray RM, & El-Samad H (2015) Population

- diversification in a yeast metabolic program promotes anticipation of environmental shifts. *Plos Biol* 13(1):e1002042.
38. Wang J, *et al.* (2015) Natural Variation in Preparation for Nutrient Depletion Reveals a Cost–Benefit Tradeoff. *Plos Biol* 13(1):e1002041.
  39. Liu X, *et al.* (2015) Reliable cell cycle commitment in budding yeast is ensured by signal integration. *eLife* 4:e03977.
  40. Solopova A, *et al.* (2014) Bet-hedging during bacterial diauxic shift. *Proceedings of the National Academy of Sciences* 111(20):7427-7432.

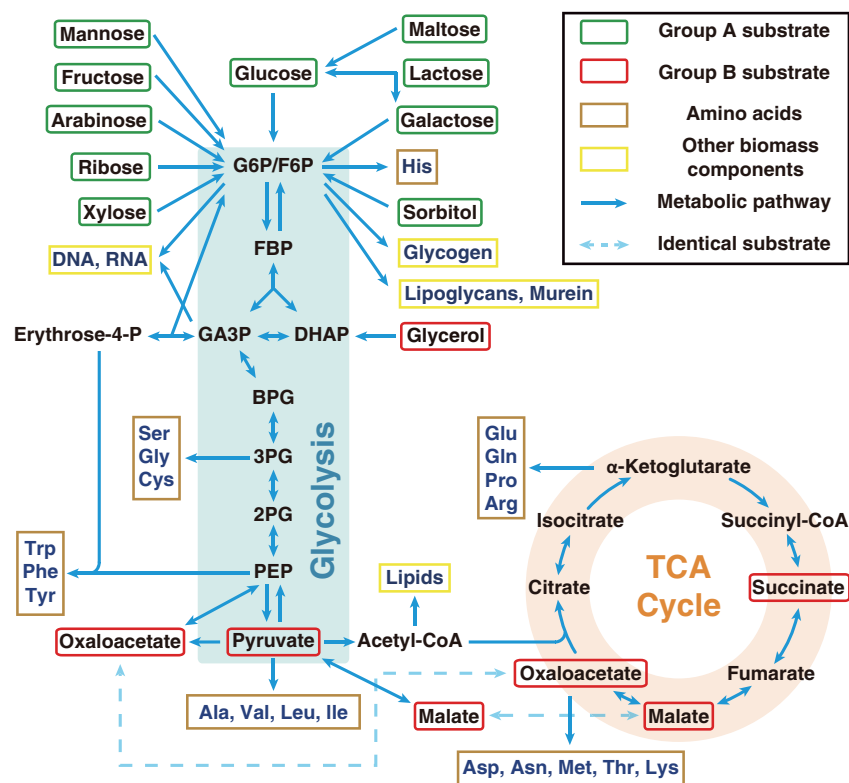

**Fig. 1. Metabolic network of carbon source utilization.** Group A substrates (in green squares) can be simultaneously utilized with Group B substrates (red squares), whereas substrates paired from Group A display diauxie. Only major pathways are shown here.

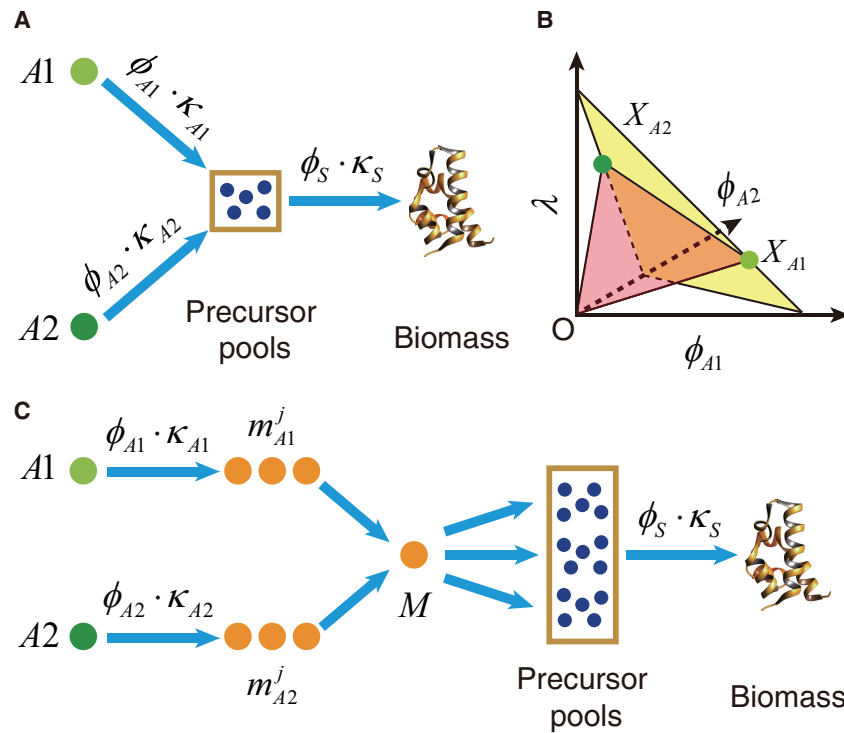

**Fig. 2. The origin of diauxic growth.** (A) Minimal model of diauxie. The carbon sources  $A1$  or  $A2$  or both can supply the precursor pools. The cell grows faster if only the more efficient source is utilized as shown in (B). (B) The relations among the enzyme mass fractions and growth rate. The maximal growth rate is at the apex (green points)  $X_{A1}$  ( $\phi_{A2}=0$ ) or  $X_{A2}$  ( $\phi_{A1}=0$ ). In either case, the suboptimal substrate is not consumed. (C) Topology of metabolic network with two Group A sources. The two carbon flux pathways from sources  $A1$  and  $A2$  can have multiple intermediate nodes (metabolites)  $m_{A1}^j$  and  $m_{A2}^j$  before merging to a common node  $M$ , after which the flux is diverted to various precursor pools.

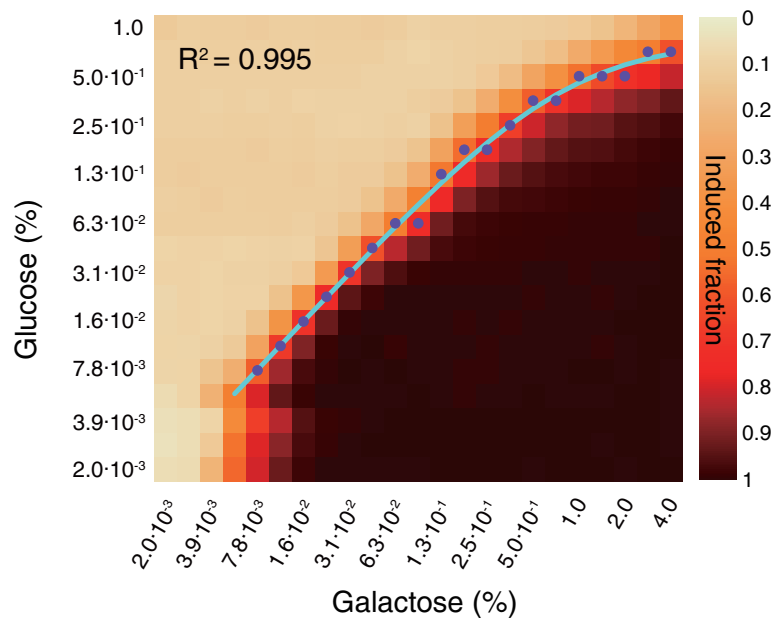

**Fig. 3. Concentration dependence of turning point.** In the experiment of Escalante-Chong et al. (29), yeast cells were cultured with a mixture of glucose and galactose of various combinations of concentrations. The induction of galactose pathway was measured in single cells with flow cytometry. The heat map represents the fraction of cells with the galactose pathway turned on for given pairs of concentrations (Reproduced with permission). The purple dots indicate the glucose concentration at which the induction fraction is at or just above 0.5 for given galactose concentration. The solid line is a fit with Eq. 6 ( $R^2 = 0.995$ ,  $k_{A1}^{A2} = 0.8256$  and  $K_{A1}^{A2} = 0.8052$ ).

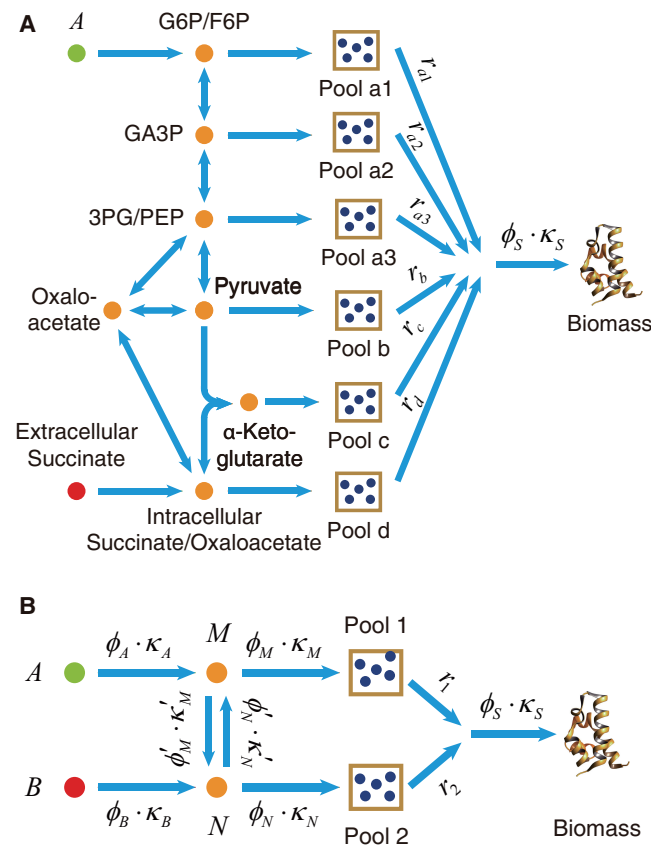

**Fig. 4. Network topology behind co-utilization.** (A) Topology of the metabolic network when Group A source is mixed with a Group B source succinate. (B) Minimal model of co-utilization. In synthesizing biomass, the two precursor pools supply  $r_1$  and  $r_2$  carbon flux, respectively. Either pool can draw flux from either of the two sources  $A$  and  $B$ . Under certain conditions, it is optimal for different sources to supply different pools exclusively.

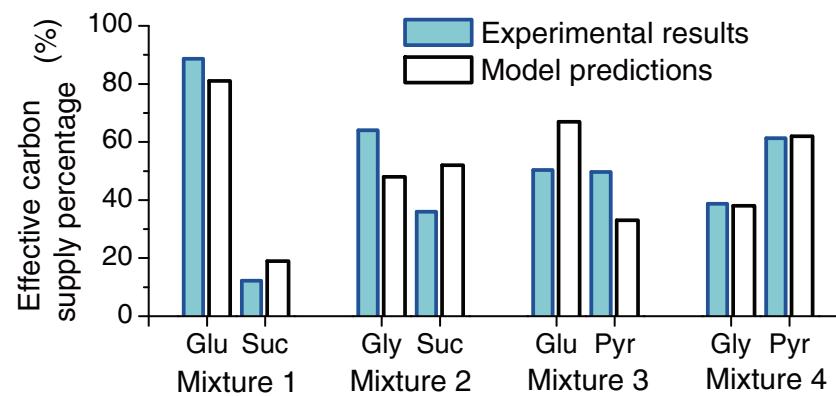

**Fig. 5. Carbon source supply percentages in the cases of co-utilization.** The experimental results were estimated from published data (6), while the model prediction values were calculated from the composition of biomass in a cell and the predicted source suppliers (Table S3) of the biomass components.
